# Supplementary material for: Calculations of interfacial interactions in pyrene-Ipa rod sensitized nanostructured TiO2
Source: Royal Society of Chemistry journal article supplement (doi:10.1039/b910880g), 2009-01-01
Supplement: b910880g.pdf [file b910880g.pdf]

*Electronic Supplementary Information*

**Calculations of Interfacial Interactions in Pyrene-Ipa Rod Sensitized Nanostructured  
TiO<sub>2</sub>**

Suman Kalyan Pal<sup>1</sup>, Villy Sundström<sup>1</sup>, Elena Galoppnini<sup>2</sup>, Petter Persson<sup>1,\*</sup>

<sup>1</sup> *Department of Chemical Physics, Lund University, Box 124, SE-22100 Lund, Sweden*

<sup>2</sup> *Department of Chemistry, Rutgers University, 73 Warren Street, Newark, New Jersey  
07102, USA*

\* Petter.Persson@chemphys.lu.se

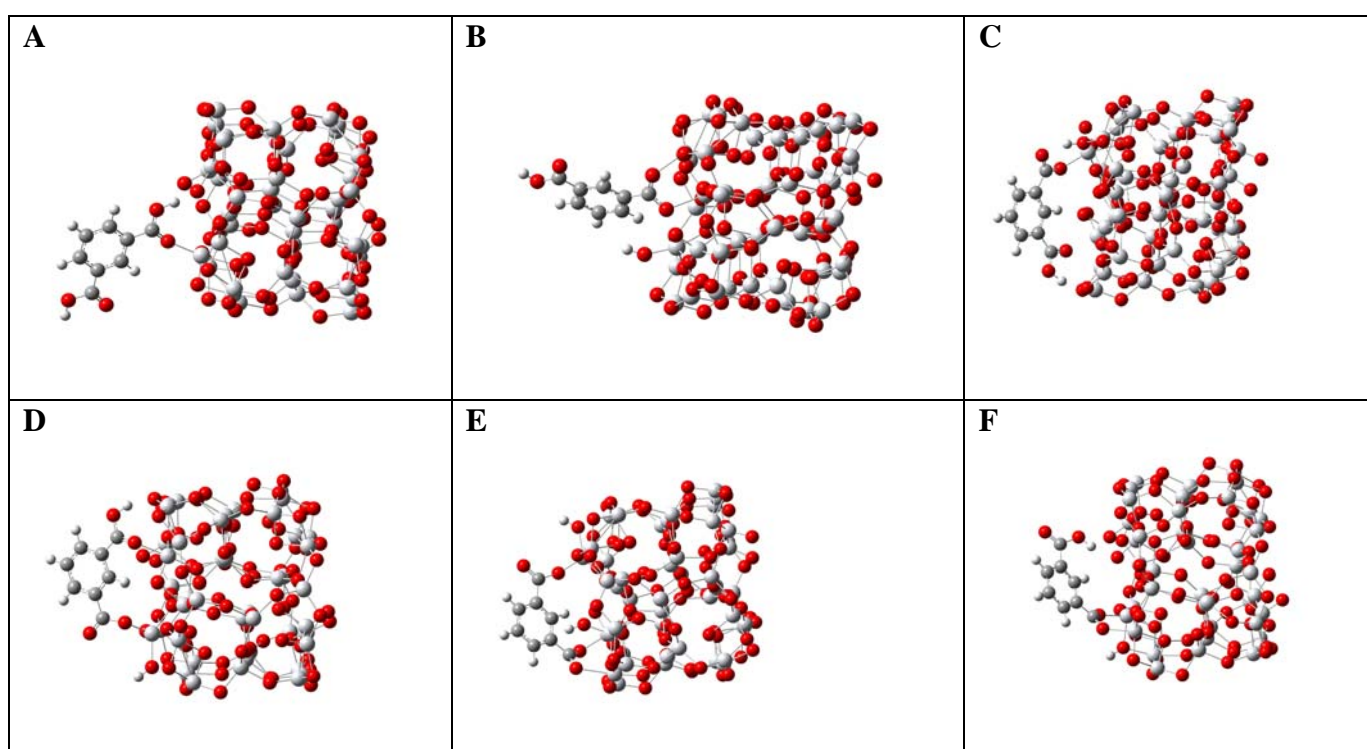

**Figure ESI1.** Fully optimized binding modes A – F of Ipa to (TiO<sub>2</sub>)<sub>46</sub>.
